# Supplementary material for: Modeling DNA-binding of Escherichia coli σ70 exhibits a characteristic energy landscape around strong promoters
Source: PubMed Central journal article supplement — Nucleic Acids Res. 2007 Oct 16;35(20):7003–10. doi: 10.1093/nar/gkm720 (PMC2175306; doi:10.1093/nar/gkm720), 2007-10-16
Supplement: nar_gkm720_1.pdf [file nar_gkm720_1.pdf]

Supporting material to article “Modeling DNA-binding of sigma70 exhibits a characteristic energy landscape around strong promoters”

---

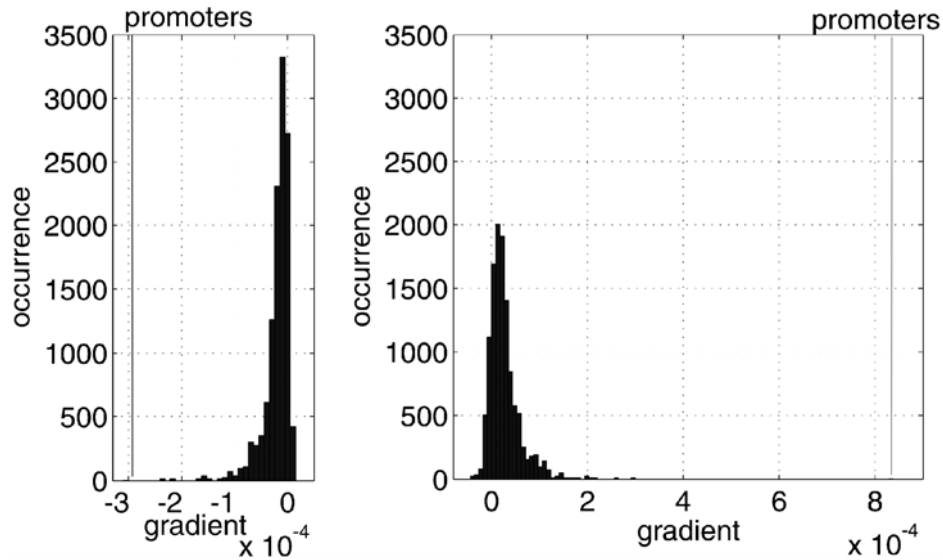

**Figure 1.** Analysis of gradients before and after the target sites obtained for the 12000 performed random permutations of  $\mathbf{W}$  and  $\varepsilon(s)$ . **Left:** Histogram of gradients in the first 250 bps of the analyzed region (500 bps around the random target sites). **Right:** Histogram of gradients in the last 150 bps of the analyzed region.

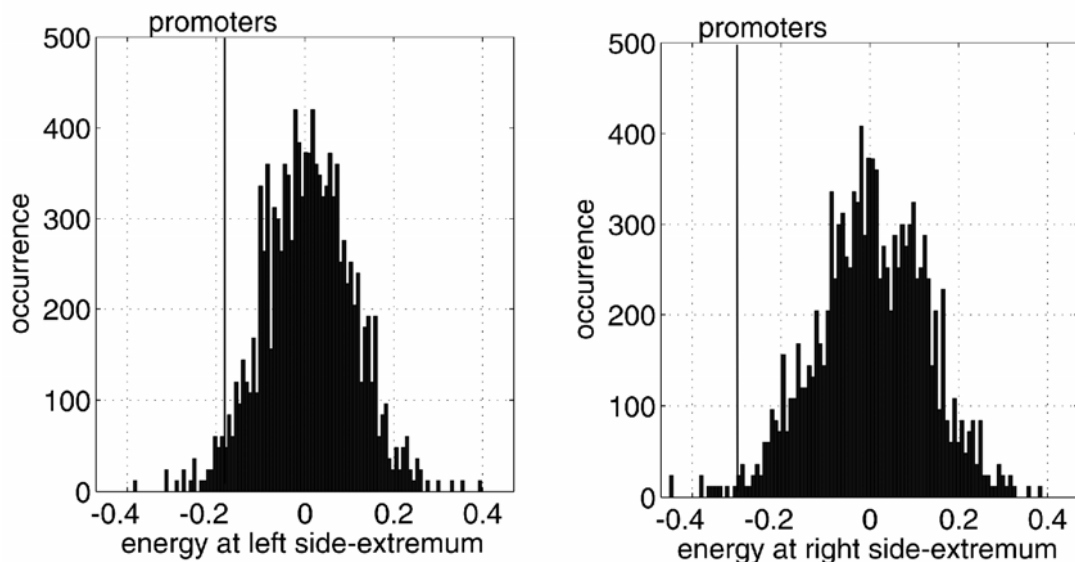

**Figure 2.** Analysis of binding energies at the side-extremals obtained for the 12000 performed random permutations of  $\mathbf{W}$  and  $\varepsilon(s)$ . **Left:** Histogram of binding energies at the extremum 23 bp before the target site. **Right:** Histogram of binding energies at the extremum 23 bp after the target site.

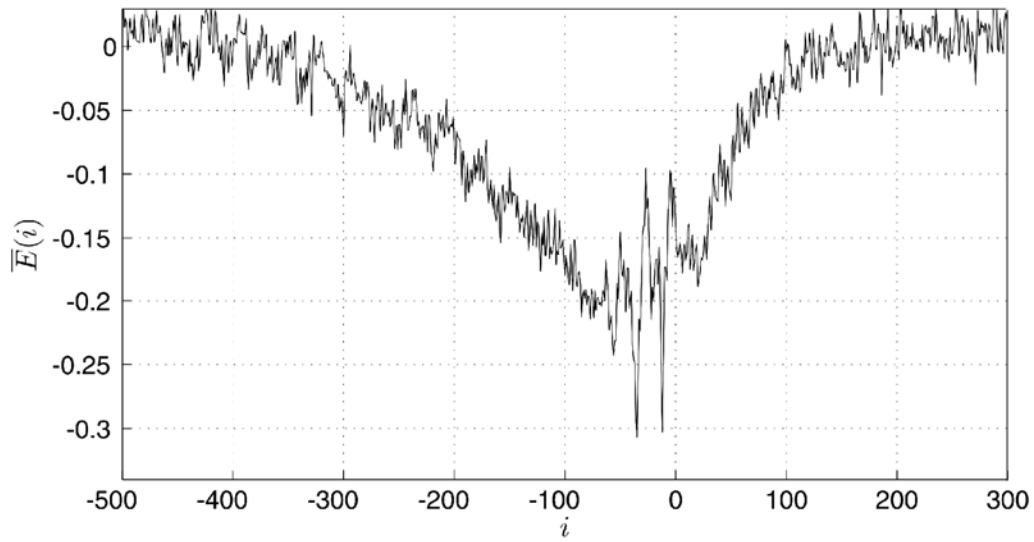

**Figure 3.** Application of the weight matrix derived from promoter strength data to a set of 651 experimentally verified sigma70-promoters downloaded from RegulonDB (version 5.7).

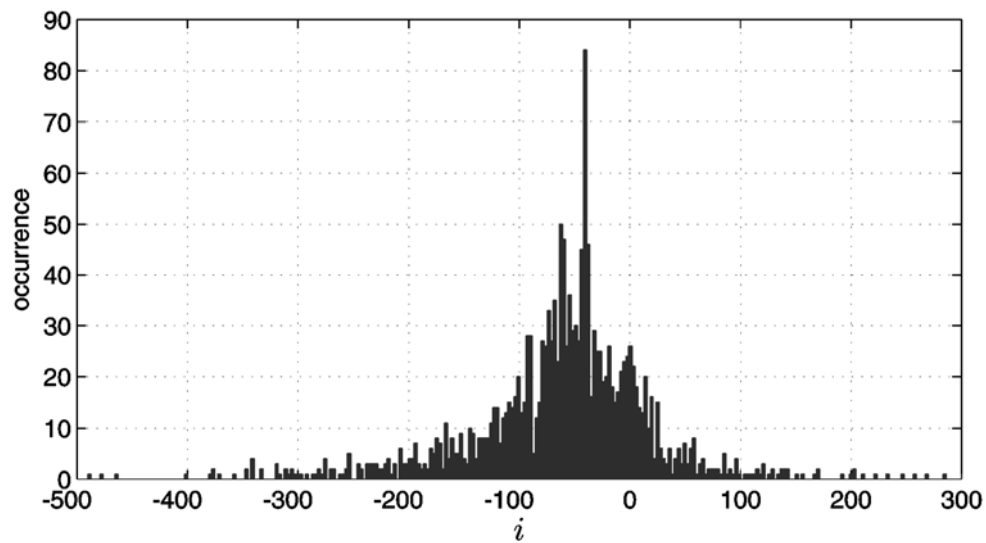

**Figure 4.** Positional distribution of the 2015 *E.coli* transcription factor binding sites downloaded from RegulonDB. Position 0 references the transcription start site.
